# Supplementary material for: Vanadium nitride/carbon nanotube nanocomposites as electrodes for supercapacitors
Source: Royal Society of Chemistry journal article supplement (doi:10.1039/c1jm11014d), 2011-01-01
Supplement: c1jm11014d.pdf [file c1jm11014d.pdf]

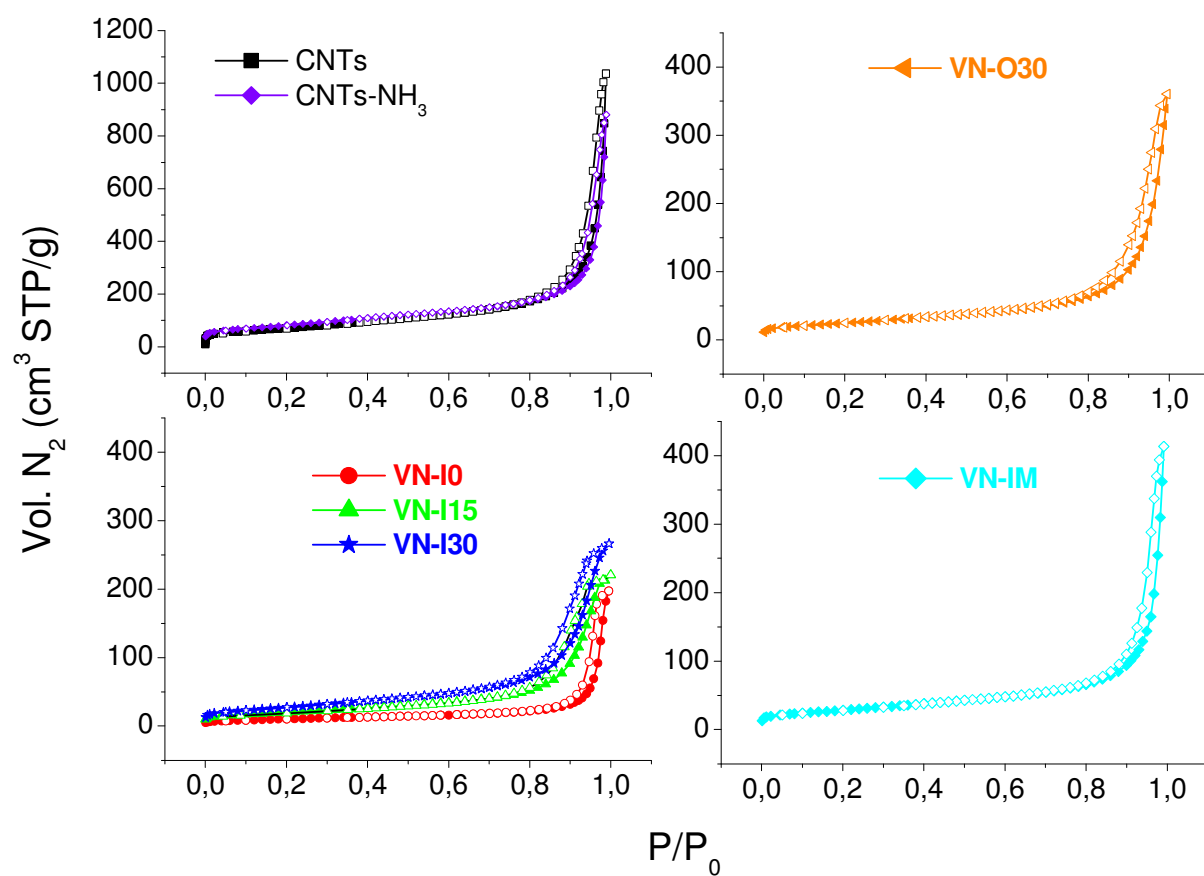

**Fig 1** Nitrogen adsorption/desorption isotherms of CNTs, CNTs-NH<sub>3</sub>, VN, and VN/CNTs materials at 77 K (closed dot: adsorption and open dot: desorption).

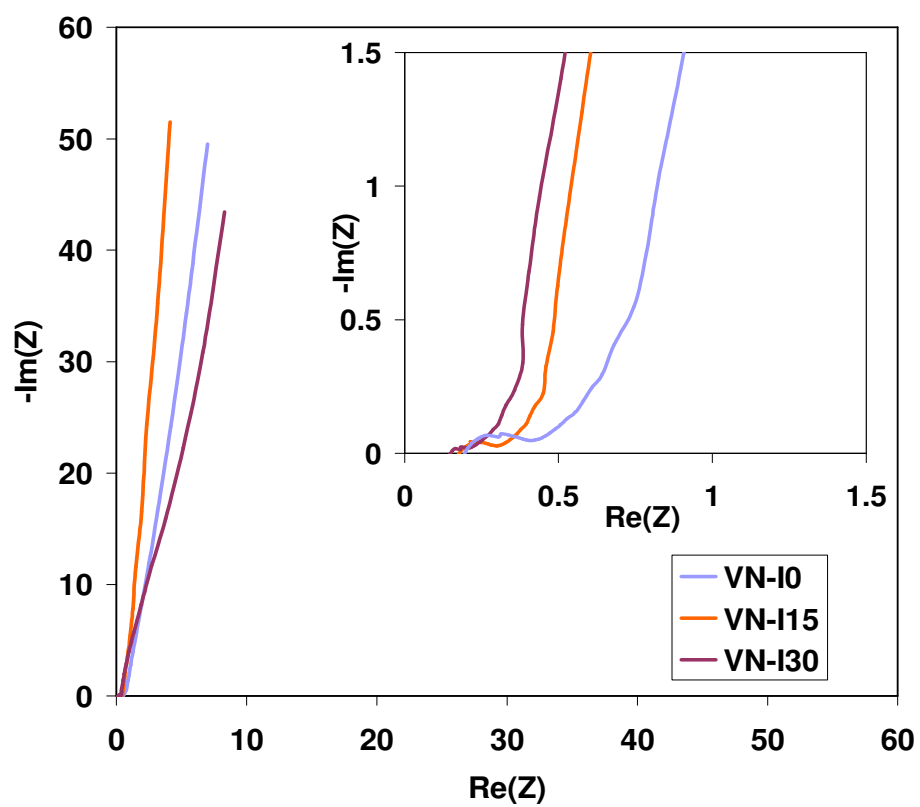

**Fig 2** Nyquist plots of supercapacitors using VN-I0, VN-I15 and VN-I30 electrodes in 6 mol L<sup>-1</sup> KOH.
